# Supplementary material for: Next generation sequencing of benzo(a)pyrene-induced lacZ mutants identifies a germ cell-specific mutation spectrum
Source: PubMed Central journal article supplement (PMC5103183; doi:10.1038/srep36743), 2016-11-10

## **SUPPLEMENTARY INFORMATION**

Next generation sequencing of benzo(a)pyrene-induced lacZ mutants identifies a germ cell-specific mutation spectrum

Jason M. O'Brien<sup>1,2</sup>, Marc A. Beal<sup>1</sup>, Carole L. Yauk<sup>1</sup> and Francesco Marchetti<sup>1\*</sup>

<sup>1</sup>Environmental Health Science and Research Bureau, Health Canada, Ottawa, ON, Canada, K1A 0K9

<sup>2</sup>Present Address: Ecotoxicology and Wildlife Health Division, Environment Canada, Ottawa, ON, Canada, K1A 0H3

JMO'B: [jason.obrien@canada.ca](mailto:jason.obrien@canada.ca)

MAB: [marc.beal@canada.ca](mailto:marc.beal@canada.ca)

CLY: [carole.yauk@canada.ca](mailto:carole.yauk@canada.ca)

\*Corresponding author:

FM: [francesco.marchetti@canada.ca](mailto:francesco.marchetti@canada.ca)

Environmental Health Centre, Tunney's Pasture, 0803A, Ottawa, ON, Canada, K1A 0K9

Phone: (613) 957-3137

Fax: (613) 941-8530

**Supplementary Figure 1:** The frequency, by type, of spontaneous or BaP-induced *lacZ* mutations recovered from sperm 42 days after treatment. The frequency of each mutation type was determined by multiplying the *lacZ* mutation frequency after clonal correction (Table 1) by the proportion of each mutation type observed (Figure 2). For example, the mutation frequency for BaP after correction was  $9.5 \times 10^{-5}$ , and the proportion of G:C  $\rightarrow$  T:A was 0.40 therefore, the mutation frequency of G:C  $\rightarrow$  T:A in BaP was  $3.8 \times 10^{-5}$ .

**Supplementary Table 1:** The position, type, and clone count for each independent *lacZ* mutation sequenced.

**Supplementary Table 2:** Sequence context analysis of spontaneous or BaP-induced *lacZ* mutations recovered from sperm 42 days after treatment.

**Supplementary Table 3:** The position and frequency of spontaneous and BaP-induced mutations at identified mutation hotspots in *lacZ* transgenes recovered from sperm 42 days after treatment.

**Supplementary Table 4:** The proportion of spontaneous and BaP-induced base-substitutions that resulted in stop, missense or silent codon mutations in *lacZ* recovered from sperm 42 days after treatment.

Supplementary Figure 1

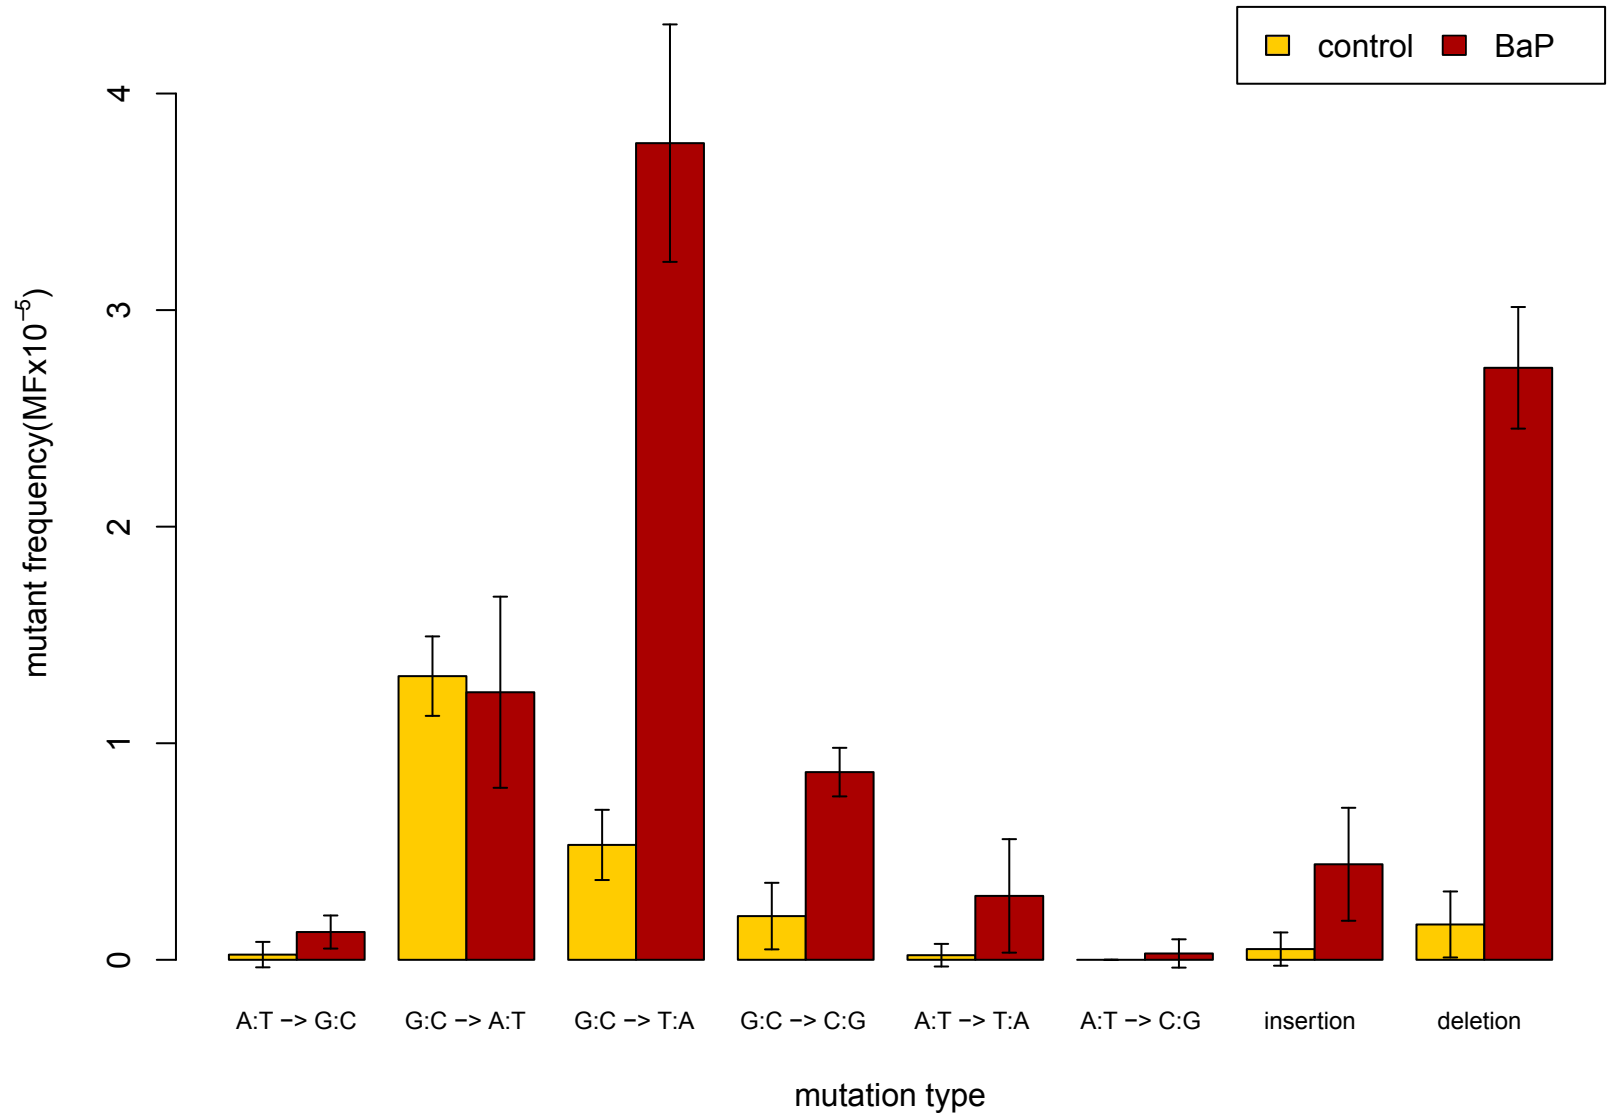

**Supplementary Table 4:** The proportion of spontaneous and BaP-induced base-substitutions that resulted in stop, missense or silent codon mutations in lacZ recovered from sperm 42 days after treatment.

|          | % Control | % BaP |
|----------|-----------|-------|
| stop     | 56.4      | 48.2  |
| missense | 43.6      | 46.2  |
| silent   | 0         | 5.6   |

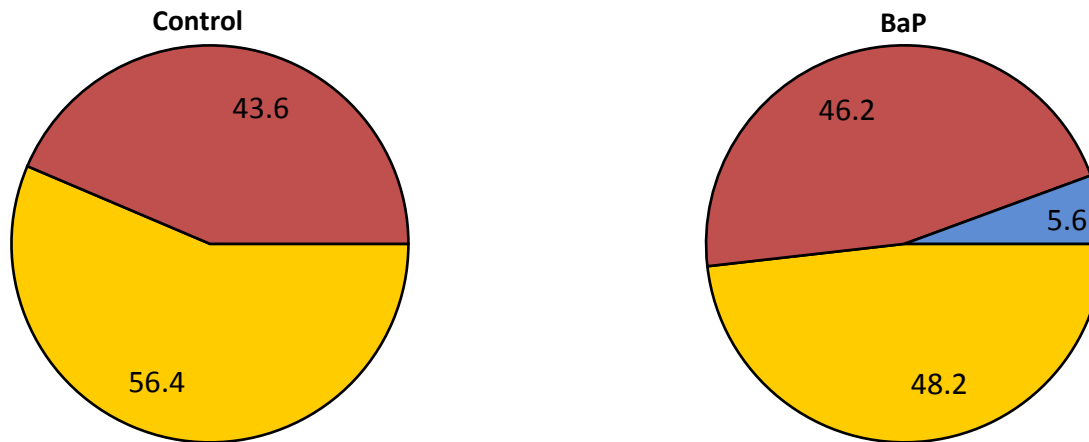

Supplement: srep36743-s1.pdf [file srep36743-s1.pdf]
